# Supplementary material
Source: PubMed Central journal article supplement (PMC7422107)
Supplement: advancesADV2020002335-suppl1.pdf [file advancesADV2020002335-suppl1.pdf]

**Supplementary Table 1.** Perioperative Interruption and Resumption Intervals

| Cohort                                  |                                     | DOAC Preoperative Management                         |                                                 | DOAC Postoperative Management                       |                                               |
|-----------------------------------------|-------------------------------------|------------------------------------------------------|-------------------------------------------------|-----------------------------------------------------|-----------------------------------------------|
|                                         |                                     | <i>Preoperative Interruption; hours median (IQR)</i> | <i>Adherence to Interruption Protocol n (%)</i> | <i>Postoperative Resumption; hours median (IQR)</i> | <i>Adherence to Resumption Protocol n (%)</i> |
| <b>Apixaban</b>                         | <i>Low bleeding risk (n = 751)</i>  | 39.4 (37.5, 41.5)                                    | 724 (96.4)                                      | 21.9 (19.1, 30.0)                                   | 651 (86.7)                                    |
|                                         | <i>High bleeding risk (n = 335)</i> | 63.8 (61.0, 67.0)                                    | 313 (93.4)                                      | 68.0 (43.6, 91.2)                                   | 328 (97.9)                                    |
| <b>Dabigatran (CrCl ≥ 50 mL/min)</b>    | <i>Low bleeding risk (n = 304)</i>  | 39.9 (38.1, 42.2)                                    | 291 (95.7)                                      | 22.7 (20.5, 33.0)                                   | 290 (95.4)                                    |
|                                         | <i>High bleeding risk (n = 162)</i> | 63.0 (61.5, 67.0)                                    | 149 (92.0)                                      | 66.5 (43.5, 81.9)                                   | 161 (99.4)                                    |
| <b>Dabigatran (CrCl &lt; 50 mL/min)</b> | <i>Low bleeding risk (n = 48)</i>   | 64.7 (62.1, 66.0)                                    | 44 (91.7)                                       | 22.1 (19.9, 33.4)                                   | 47 (97.9)                                     |
|                                         | <i>High bleeding risk (n = 21)</i>  | 110 (107.8, 114.1)                                   | 17 (81.0)                                       | 67.5 (54.0, 88.9)                                   | 21 (100.0)                                    |
| <b>Dabigatran (all patients)</b>        | <i>Low bleeding risk (n = 352)</i>  | 40.5 (38.4, 44.7)                                    | 335 (95.2)                                      | 22.7 (20.4, 33.1)                                   | 337 (95.7)                                    |
|                                         | <i>High bleeding risk (n = 183)</i> | 63.8 (61.7, 74.3)                                    | 166 (90.7)                                      | 66.5 (44.9, 81.9)                                   | 182 (99.5)                                    |
| <b>Rivaroxaban</b>                      | <i>Low bleeding risk (n = 606)</i>  | 48.0 (40.8, 51.0)                                    | 576 (95.1)                                      | 24.2 (20.6, 33.0)                                   | 539 (88.9)                                    |
|                                         | <i>High bleeding risk (n = 314)</i> | 72.0 (66.1, 75.0)                                    | 296 (94.3)                                      | 69.6 (46.0, 95.5)                                   | 311 (99.0)                                    |

**Supplementary Table 1 Perioperative Interruption and Resumption Intervals.** DOAC = direct oral anticoagulant; CrCl = creatinine clearance.

**Supplementary Table 2.** Residual DOAC Levels – Stratified by Procedural Bleeding

| DOAC                          | Procedural Bleeding Risk | Residual DOAC Level (ng/mL) |                                 | Association for residual level $\geq$ 30 ng/mL                        | Residual DOAC Level (ng/mL) |                                 | Association for residual level $\geq$ 50 ng/mL                        |
|-------------------------------|--------------------------|-----------------------------|---------------------------------|-----------------------------------------------------------------------|-----------------------------|---------------------------------|-----------------------------------------------------------------------|
|                               |                          | < 30 ng/mL<br><i>n</i> (%)  | $\geq$ 30 ng/mL<br><i>n</i> (%) |                                                                       | < 50 ng/mL<br><i>n</i> (%)  | $\geq$ 50 ng/mL<br><i>n</i> (%) |                                                                       |
| <b>Apixaban</b><br>N = 1086   | <i>High</i><br>N=335     | 312<br>(93.1%)              | 23<br>(6.9%)                    | High risk vs low risk OR=0.167, 95% CI 0.104-0.257; <b>p&lt;0.001</b> | 328<br>(97.9%)              | 7<br>(2.1%)                     | High risk vs low risk OR=0.146, 95% CI 0.061-0.295; <b>p&lt;0.001</b> |
|                               | <i>Low</i><br>N=751      | 521<br>(69.4%)              | 230<br>(30.6%)                  |                                                                       | 655<br>(87.2%)              | 96<br>(12.8%)                   |                                                                       |
| <b>Dabigatran</b><br>N = 535  | <i>High</i><br>N=183     | 181<br>(98.9%)              | 2<br>(1.1%)                     | High risk vs low risk OR=0.054, 95% CI 0.009-0.175; <b>p&lt;0.001</b> | 182<br>(99.5%)              | 1<br>(0.6%)                     | High risk vs low risk OR=0.072, 95% CI 0.004-0.343; <b>p=0.010</b>    |
|                               | <i>Low</i><br>N=352      | 292<br>(83.0%)              | 60<br>(17.1%)                   |                                                                       | 327<br>(92.9%)              | 25<br>(7.1%)                    |                                                                       |
| <b>Rivaroxaban</b><br>N = 920 | <i>High</i><br>N=314     | 268<br>(85.4%)              | 46<br>(14.7%)                   | High risk vs low risk OR=0.478, 95% CI 0.330-0.682; <b>p&lt;0.001</b> | 312<br>(99.4%)              | 2<br>(0.7%)                     | High risk vs low risk OR=0.137, 95% CI 0.022-0.462; <b>p=0.007</b>    |
|                               | <i>Low</i><br>N=606      | 446<br>(73.6%)              | 160<br>(26.4%)                  |                                                                       | 579<br>(95.5%)              | 27<br>(4.5%)                    |                                                                       |

**Supplementary Table 2 Residual DOAC Levels – Stratified by Procedural Bleeding Risk.** DOAC: direct oral anticoagulant. A greater proportion of patients undergoing low bleeding risk procedures (with shorter preprocedural interruption intervals) had residual preprocedural DOAC levels of  $\geq$  30 ng/mL and  $\geq$  50 ng/mL. The result was statistically significant across all DOAC types.

**Supplementary Table 3.** Residual DOAC Levels – Stratified by DOAC Dosing

| Low Bleeding Risk Procedures  |                          |                             |                          |                                                                       |                             |                          |                                                                     |
|-------------------------------|--------------------------|-----------------------------|--------------------------|-----------------------------------------------------------------------|-----------------------------|--------------------------|---------------------------------------------------------------------|
| DOAC                          | Dosing                   | Residual DOAC Level (ng/mL) |                          | Association for residual level $\geq$ 30 ng/mL                        | Residual DOAC Level (ng/mL) |                          | Association for residual level $\geq$ 50 ng/mL                      |
|                               |                          | < 30 ng/mL<br>n (%)         | $\geq$ 30 ng/mL<br>n (%) |                                                                       | < 50 ng/mL<br>n (%)         | $\geq$ 50 ng/mL<br>n (%) |                                                                     |
| Apixaban<br>N = 751           | 5 mg po BID<br>N = 620   | 431<br>(69.5%)              | 189<br>(30.5%)           | High dose vs low dose<br>OR=0.96, 95% CI 0.64-1.46;<br><b>p=0.854</b> | 537<br>(86.6%)              | 83<br>(13.4%)            | High dose vs low dose OR=1.403, 95% CI 0.781-2.713; <b>p=0.283</b>  |
|                               | 2.5 mg po BID<br>N = 131 | 90<br>(68.7%)               | 41<br>(31.3%)            |                                                                       | 118<br>(90.1%)              | 13<br>(9.9%)             |                                                                     |
| Dabigatran<br>N = 352         | 150 mg po BID<br>N = 226 | 193<br>(85.4%)              | 33<br>(14.6%)            | High dose vs low dose<br>OR=0.63, 95% CI 0.36-1.11;<br><b>p=0.104</b> | 212<br>(93.8%)              | 14<br>(6.2%)             | High dose vs low dose OR=0.690, 95% CI 0.304-1.603; <b>p=0.377</b>  |
|                               | 110 mg po BID<br>N = 126 | 99<br>(78.6%)               | 27 (21.4%)               |                                                                       | 115<br>(91.3%)              | 11<br>(8.7%)             |                                                                     |
| Rivaroxaban<br>N = 605        | 20 mg po OD<br>N = 520   | 385<br>(74.0%)              | 135<br>(26.0%)           | High dose vs low dose<br>OR=0.84, 95% CI 0.51-1.42;<br><b>p=0.504</b> | 495<br>(95.2%)              | 25 (4.8%)                | High dose vs low dose OR=2.096, 95% CI 0.609-13.179; <b>p=0.320</b> |
|                               | 15 mg po OD<br>N = 85    | 60<br>(70.6%)               | 25<br>(29.4%)            |                                                                       | 83<br>(97.6%)               | 2<br>(2.4%)              |                                                                     |
| High Bleeding Risk Procedures |                          |                             |                          |                                                                       |                             |                          |                                                                     |
| DOAC                          | Dosing                   | Residual DOAC Level (ng/mL) |                          | Association for residual level $\geq$ 30 ng/mL                        | Residual DOAC Level (ng/mL) |                          | Association for residual level $\geq$ 50 ng/mL                      |
|                               |                          | < 30 ng/mL<br>n (%)         | $\geq$ 30 ng/mL<br>n (%) |                                                                       | < 50 ng/mL<br>n (%)         | $\geq$ 50 ng/mL<br>n (%) |                                                                     |
| Apixaban<br>N = 334           | 5 mg po BID<br>N = 256   | 238<br>(93.0%)              | 18<br>(7.0%)             | High dose vs low dose<br>OR=1.10, 95% CI 0.42-3.44;<br><b>p=0.85</b>  | 251<br>(98.0%)              | 5<br>(2.0%)              | High dose vs low dose OR=0.757, 95% CI 0.160-5.359; <b>p=0.742</b>  |
|                               | 2.5 mg po BID<br>N = 78  | 73<br>(93.6%)               | 5<br>(6.4%)              |                                                                       | 76<br>(97.4%)               | 2<br>(2.6%)              |                                                                     |
| Dabigatran<br>N = 183         | 150 mg po BID<br>N = 105 | 103<br>(98.1%)              | 2<br>(1.90%)             | N/A                                                                   | 104<br>(99.1%)              | 1<br>(1.0%)              | N/A                                                                 |
|                               | 110 mg po BID<br>N = 78  | 78<br>(100%)                | 0                        |                                                                       | 78 (100%)                   | 0                        |                                                                     |
| Rivaroxaban<br>N = 314        | 20 mg po OD<br>N = 243   | 209<br>(86.0%)              | 34<br>(14.0%)            | High dose vs low dose<br>OR=0.80, 95% CI 0.40-1.70;<br><b>p=0.542</b> | 242<br>(99.6%)              | 1<br>(0.4%)              | High dose vs low dose OR=0.289, 95% CI 0.011-7.377; <b>p=0.383</b>  |
|                               | 15 mg po OD<br>N = 71    | 59<br>(83.1%)               | 12<br>(16.9%)            |                                                                       | 70<br>(98.6%)               | 1<br>(1.4%)              |                                                                     |

**Supplementary Table 3 Residual DOAC Levels – Stratified by DOAC Dosing.** DOAC: direct oral anticoagulant. The proportion of patients with residual DOAC levels  $\geq$  30 ng/mL and  $\geq$  50 ng/mL according to DOAC dosing was assessed, stratified according to DOAC dosing. No statistically significant relationship between DOAC dosing and residual DOAC levels was found.



**Supplementary Table 4. Clinical Parameters Associated with Residual DOAC Levels – Univariate Logistic Regression Analyses**

| Low Bleeding Risk Procedures       |                             |                                       |                                       |                                       |                                |                                       |                                |
|------------------------------------|-----------------------------|---------------------------------------|---------------------------------------|---------------------------------------|--------------------------------|---------------------------------------|--------------------------------|
| Clinical Parameter                 | Comparison                  | Apixaban                              |                                       | Dabigatran                            |                                | Rivaroxaban                           |                                |
|                                    |                             | ≥ 30 ng/mL<br>OR [95% CI]             | ≥ 50 ng/mL<br>OR [95% CI]             | ≥ 30 ng/mL<br>OR [95% CI]             | ≥ 50 ng/mL<br>OR [95% CI]      | ≥ 30 ng/mL<br>OR [95% CI]             | ≥ 50 ng/mL<br>OR [95% CI]      |
| Age (years)                        | ≥ 75 vs < 75                | <b>1.68 [1.29-2.18]</b><br>p = 0.0001 | <b>1.85 [1.23-2.79]</b><br>p = 0.003  | <b>1.68 [1.01-2.78]</b><br>p = 0.0452 | 1.23 [0.56-2.72]<br>p = 0.6031 | 1.15 [0.84-1.57]<br>p = 0.3924        | 1.01 [0.47-2.18]<br>p = 0.9737 |
| Sex                                | Female vs Male              | <b>1.51 [1.16-1.95]</b><br>p = 0.0021 | <b>2.31 [1.55-3.45]</b><br>p < 0.0001 | 1.07 [0.61-1.85]<br>p = 0.8230        | 0.78 [0.31-1.96]<br>p = 0.6048 | <b>1.5 [1.1-2.06]</b><br>p = 0.0112   | 0.9 [0.39-2.06]<br>p = 0.8047  |
| Weight (kg)                        | 70-90 vs < 70               | 0.78 [0.56-1.1]<br>p = 0.1553         | 0.67 [0.41-1.1]<br>p = 0.1175         | 1.17 [0.53-2.58]<br>p = 0.6996        | 1.66 [0.34-8.23]<br>p = 0.5342 | 0.7 [0.46-1.05]<br>p = 0.0865         | 0.73 [0.21-2.59]<br>p = 0.6268 |
|                                    | > 90 vs < 70                | <b>0.66 [0.47-0.92]</b><br>p = 0.0149 | <b>0.49 [0.29-0.82]</b><br>p = 0.0063 | 1.45 [0.69-3.04]<br>p = 0.3224        | 3.47 [0.8-15.03]<br>p = 0.0959 | 0.72 [0.49-1.07]<br>p = 0.1072        | 1.84 [0.62-5.47]<br>p = 0.2725 |
| Creatinine Clearance (ml/min)      | ≥ 50 vs < 50                | <b>0.51 [0.38-0.68]</b><br>p < 0.0001 | <b>0.42 [0.27-0.65]</b><br>p = 0.0001 | 0.63 [0.34-1.19]<br>p = 0.1545        | 1.82 [0.43-7.7]<br>p = 0.4184  | 0.81 [0.53-1.24]<br>p = 0.3317        | 1.87 [0.44-7.91]<br>p = 0.3928 |
| P-Glycoprotein or CYP3A4 Inhibitor | Presence vs Absence         | 1.2 [0.73-1.96]<br>p = 0.4787         | 1.36 [0.66-2.81]<br>p = 0.4031        | 0.98 [0.39-2.44]<br>p = 0.9581        | 0.93 [0.22-3.96]<br>p = 0.9254 | 1.09 [0.57-2.06]<br>p = 0.797         | 1.31 [0.31-5.51]<br>p = 0.7170 |
| Cancer                             | Presence vs Absence         | 0.9 [0.64-1.24]<br>p = 0.5082         | 0.87 [0.52-1.46]<br>p = 0.6038        | 0.92 [0.48-1.74]<br>p = 0.7919        | 0.98 [0.82-1.18]<br>p = 0.8426 | 1.0 [0.98-1.02]<br>p = 0.8539         | 0.98 [0.81-1.17]<br>p = 0.7883 |
| Active Cancer                      | Presence vs Absence         | 0.92 [0.47-1.78]<br>p = 0.7940        | 1.23 [0.5-3.04]<br>p = 0.6464         | 1.11 [0.35-3.53]<br>p = 0.8658        | 1.83 [0.43-7.75]<br>p = 0.4140 | 0.91 [0.43-1.94]<br>p = 0.8079        | 2.49 [0.75-8.26]<br>p = 0.1368 |
| DOAC Dosing                        | Low Dose vs Standard Dose * | 1.03 [0.73-1.76]<br>p = 0.8785        | 0.74 [0.41-1.33]<br>p = 0.3155        | 1.47 [0.88-2.44]<br>p = 0.1394        | 1.41 [0.64-3.1]<br>p = 0.3945  | 1.14 [0.74-1.74]<br>p = 0.5606        | 0.49 [0.12-2.07]<br>p = 0.3322 |
| DOAC Interruption (hours)          | < 36 vs 36-48               | 1.13 [0.73-1.76]<br>p = 0.5869        | 1.3 [0.67-2.51]<br>p = 0.4341         | 2.06 [1.0-4.28]<br>p = 0.0513         | 1.89 [0.64-5.57]<br>p = 0.2514 | 1.64 [0.89-3.0]<br>p = 0.1099         | 2.1 [0.61-7.21]<br>p = 0.2383  |
|                                    | > 48 vs 36-48               | 0.95 [0.54-1.66]<br>p = 0.8568        | 1.66 [0.83-3.32]<br>p = 0.1479        | 1.31 [0.71-2.42]<br>p = 0.3881        | 0.58 [0.17-1.96]<br>p = 0.3786 | 0.74 [0.53-1.02]<br>p = 0.0659        | 0.47 [0.2-1.1]<br>p = 0.0824   |
| High Bleeding Risk Procedures      |                             |                                       |                                       |                                       |                                |                                       |                                |
| Clinical Parameter                 | Comparison                  | Apixaban                              |                                       | Dabigatran                            |                                | Rivaroxaban                           |                                |
|                                    |                             | ≥ 30 ng/mL<br>OR [95% CI]             | ≥ 50 ng/mL<br>OR [95% CI]             | ≥ 30 ng/mL<br>OR [95% CI]             | ≥ 50 ng/mL<br>OR [95% CI]      | ≥ 30 ng/mL<br>OR [95% CI]             | ≥ 50 ng/mL<br>OR [95% CI]      |
| Age (years)                        | ≥ 75 vs < 75                | <b>2.56 [1.01-6.49]</b><br>p = 0.0478 |                                       |                                       |                                | 0.83 [0.46-1.49]<br>p = 0.5320        |                                |
| Sex                                | Female vs Male              | <b>2.58 [1.12-5.96]</b><br>p = 0.0265 |                                       |                                       |                                | 1.71 [0.96-3.04]<br>p = 0.0698        |                                |
| Weight (kg)                        | 70-90 vs < 70               | 0.58 [0.25-1.36]<br>p = 0.2095        |                                       |                                       |                                | <b>0.42 [0.21-0.82]</b><br>p = 0.0106 |                                |
|                                    | > 90 vs < 70                | <b>0.15 [0.03-0.69]</b><br>p = 0.0145 |                                       |                                       |                                | <b>0.37 [0.17-0.76]</b><br>p = 0.0073 |                                |
| Creatinine Clearance (ml/min)      | ≥ 50 vs < 50                | <b>0.21 [0.09-0.48]</b><br>p = 0.0002 |                                       |                                       |                                | 0.66 [0.34-1.3]<br>p = 0.2308         |                                |
| P-Glycoprotein or CYP3A4 Inhibitor | Presence vs Absence         | 1.9 [0.45-8.1]<br>p = 0.3862          |                                       |                                       |                                | 1.25 [0.3-5.16]<br>p = 0.7559         |                                |
| Cancer                             | Presence vs Absence         | 0.67 [0.27-1.62]<br>p = 0.3701        |                                       |                                       |                                | 0.84 [0.46-1.54]<br>p = 0.5716        |                                |
| Active Cancer                      | Presence vs Absence         | 0.47 [0.11-2.02]<br>p = 0.3137        |                                       |                                       |                                | 0.73 [0.33-1.63]<br>p = 0.4423        |                                |
| DOAC Dosing                        | Low Dose vs Standard Dose * | 0.92 [0.34-2.47]<br>p = 0.8609        |                                       |                                       |                                | 1.21 [0.63-2.33]<br>p = 0.5737        |                                |
| DOAC Interruption (hours)          | < 60 vs 60-72               | 1.12 [0.38-3.32]<br>p = 0.8323        |                                       |                                       |                                | 1.55 [0.46-5.17]<br>p = 0.4773        |                                |
|                                    | > 72 vs 60-72               | 0.65 [0.09-4.88]<br>p = 0.6767        |                                       |                                       |                                | 1.08 [0.6-1.97]<br>p = 0.7913         |                                |

**Supplementary Table 4 Univariate Analyses.** DOAC: direct oral anticoagulant; univariate analyses were not possible for patients undergoing high bleeding risk procedures with residual levels ≥ 30 ng/mL on dabigatran and for patients with residual levels ≥ 50 ng/mL due to the low number of patients in these categories. \*Greyed boxes represent variables that were omitted from the multivariate model due to small sample sizes and minimal impact on the model.

### *Factors Associated with Residual Apixaban Levels*

With respect to patients on apixaban undergoing low risk procedures, factors associated with a greater likelihood of residual levels  $\geq 30$  ng/mL were age  $\geq 75$  ( $p = 0.0001$ ), female sex ( $p = 0.0021$ ), a weight of  $< 70$  kg as compared to  $> 90$  kg ( $p = 0.0149$ ) and a creatinine clearance  $< 50$  mL/min ( $p < 0.0001$ ). These same clinical parameters were also found to be associated with residual levels  $\geq 50$  ng/mL among patients undergoing low risk procedures.

Age  $\geq 75$  ( $p = 0.0478$ ), female sex ( $p = 0.0265$ ), a weight of  $< 70$  kg compared to  $> 90$  kg ( $p = 0.0145$ ) and a creatinine clearance  $< 50$  ml/min ( $p = 0.0002$ ) were also associated with residual levels of  $\geq 30$  ng/mL for patients on apixaban undergoing high risk procedures. We were unable to perform analyses with respect to patients on apixaban undergoing high bleeding risk procedures due to the low number of high-risk patients with residual levels  $\geq 50$  ng/mL. Progressively shorter preprocedural interruption intervals ( $< 36$  vs 36-48, 36-48 vs  $> 48$ ) were not significantly associated with an increased likelihood of residual levels  $\geq 30$  ng/mL or  $\geq 50$  ng/mL.

### *Factors Associated with Residual Dabigatran Levels*

Age  $\geq 75$  ( $p = 0.0452$ ) was the only factor identified by univariate analysis that was significantly associated with residual dabigatran levels  $\geq 30$  ng/mL among patients undergoing low risk procedures. An interruption interval of  $< 36$  hours (vs 36-48,  $p = 0.0513$ ) was of borderline statistical significance with respect to residual levels  $\geq 30$  ng/mL. We were unable to identify any clinical parameters that were associated with residual dabigatran levels of  $\geq 50$  ng/mL.

There were not enough patients on dabigatran undergoing high risk procedures with residual levels  $\geq 30$  ng/mL or  $\geq 50$  ng/mL to perform meaningful analyses.

### *Factors Associated with Residual Rivaroxaban Levels*

Among patients on rivaroxaban undergoing low-risk procedures, the only factor identified by univariate analysis that was associated with residual levels  $\geq 30$  ng/mL was female sex ( $p = 0.0112$ ). An interruption interval of  $> 48$  hours (vs 36-48 hours) achieved borderline statistical significance ( $p = 0.0659$ ) with respect to a lower likelihood of residual rivaroxaban levels  $\geq 30$

ng/mL among low-risk patients. Decreasing weight demonstrated a trend towards higher residual levels  $\geq 30$  ng/mL (weight  $< 70$  kg vs 70-90 kg,  $p = 0.0865$ ; weight  $< 70$  kg vs  $> 90$  kg,  $p = 0.1072$ ). We were unable to identify any significant factors via univariate analysis that were associated with residual rivaroxaban levels  $\geq 50$  ng/mL for low-risk procedures, although an interruption interval of 36-48 hours (vs  $> 48$  hours) was of marginal statistical significance ( $p = 0.0824$ ).

With respect to high-risk patients, lower weight was associated with a higher likelihood of residual levels  $\geq 30$  ng/mL ( $< 70$  kg vs 70-90 kg  $p = 0.0106$ ;  $< 70$  kg vs  $> 90$  kg  $p = 0.0073$ ). There were not enough high-risk patients with residual levels  $\geq 50$  ng/mL to perform meaningful analyses.
